# Supplementary material for: A dimeric fullerene derivative for efficient inverted planar perovskite solar cells with improved stability
Source: Royal Society of Chemistry journal article supplement (doi:10.1039/c7ta00362e), 2017-01-01
Supplement: c7ta00362e1.pdf [file c7ta00362e1.pdf]

## Electronic Supplementary Information

### **A dimeric fullerene derivative for efficient inverted planar perovskite solar cells with improved stability**

Chengbo Tian,<sup>†</sup> Kevin Kochiss,<sup>‡</sup> Edison Castro,<sup>†</sup> German Betancourt,<sup>†</sup> Hongwei Han,<sup>§</sup> and Luis Echegoyen.<sup>\*†</sup>

<sup>†</sup> Department of Chemistry, University of Texas at El Paso, 500 West University Avenue, El Paso, TX 79968, United States

<sup>§</sup> Michael Grätzel Center for Mesoscopic Solar Cells, Wuhan National Laboratory for Optoelectronics, School of Optical and Electronic Information, Huazhong University of Science and Technology, Wuhan 430074, Hubei, People's Republic of China

<sup>‡</sup> Department of Chemistry and Biochemistry, Center for Polymers and Organic Solids, University of California, Santa Barbara, CA 93106, United States

\*E-mail: [echegoyen@utep.edu](mailto:echegoyen@utep.edu)

## General Methodology

All chemicals were reagent grade, purchased from Sigma Aldrich. Silica gel (Redisep silica, 40-60  $\mu$ , 60 Å) was used to separate the products from the pristine fullerene. MALDI-TOF mass spectrometric measurements were obtained on a Bruker Microflex LRF mass spectrometer on reflector positive mode. The NMR spectra were recorded using a Bruker 400 MHz spectrometer. The UV/Vis-NIR spectra were taken using a Cary 5000 UV/Vis-NIR spectrophotometer using toluene solutions. Cyclic voltammetry (CV) experiments were carried out under an Argon atmosphere at room temperature using a CH Instrument Potentiostat. Scan rate for CV experiments was 100 mV/s. A one compartment cell with a standard three-electrode set up was used, consisting of a 1 mm diameter glassy carbon disk as the working electrode, a platinum wire as the counter electrode and a silver wire as the pseudo-reference electrode, in a solution of anhydrous *o*-DCB containing 0.05 M *n*-Bu<sub>4</sub>NPF<sub>6</sub>. Ferrocene was added to the solution at the end of each experiment as an internal standard.

## Characterization of D-C<sub>60</sub>

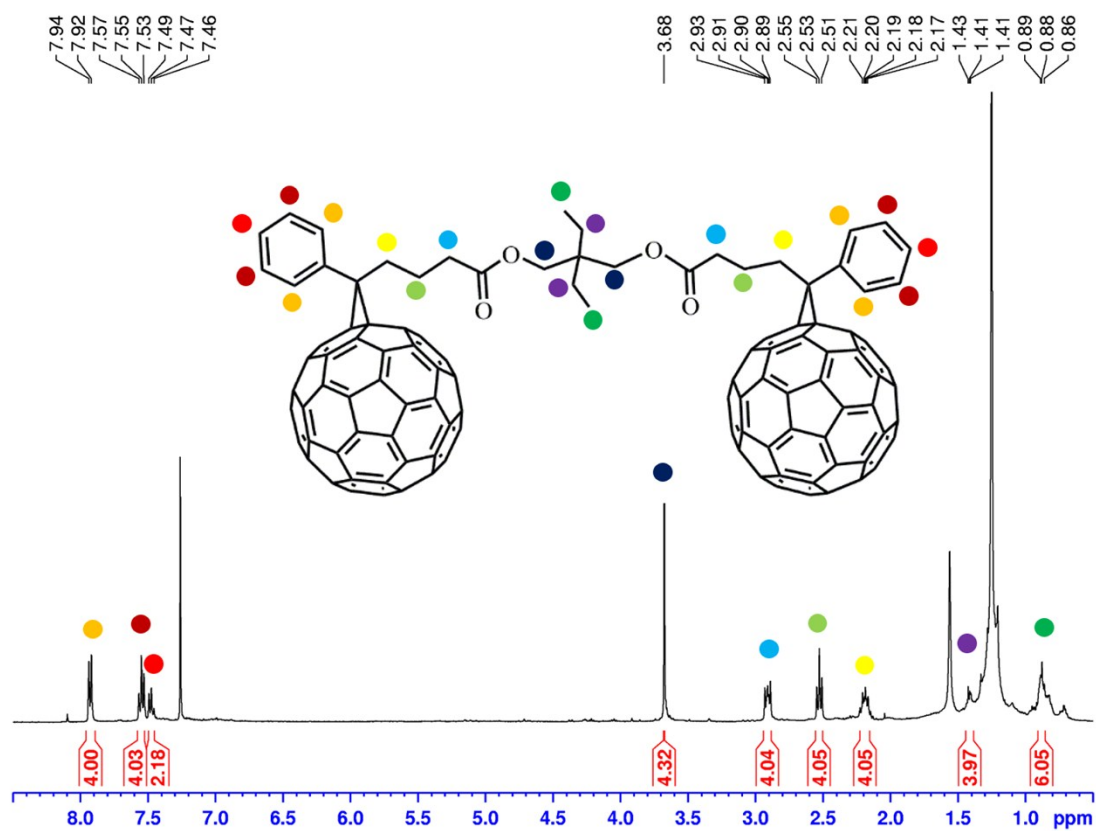

**Figure S1.** <sup>1</sup>H-NMR (400 MHz; CDCl<sub>3</sub>, 298 K) of D-C<sub>60</sub>.

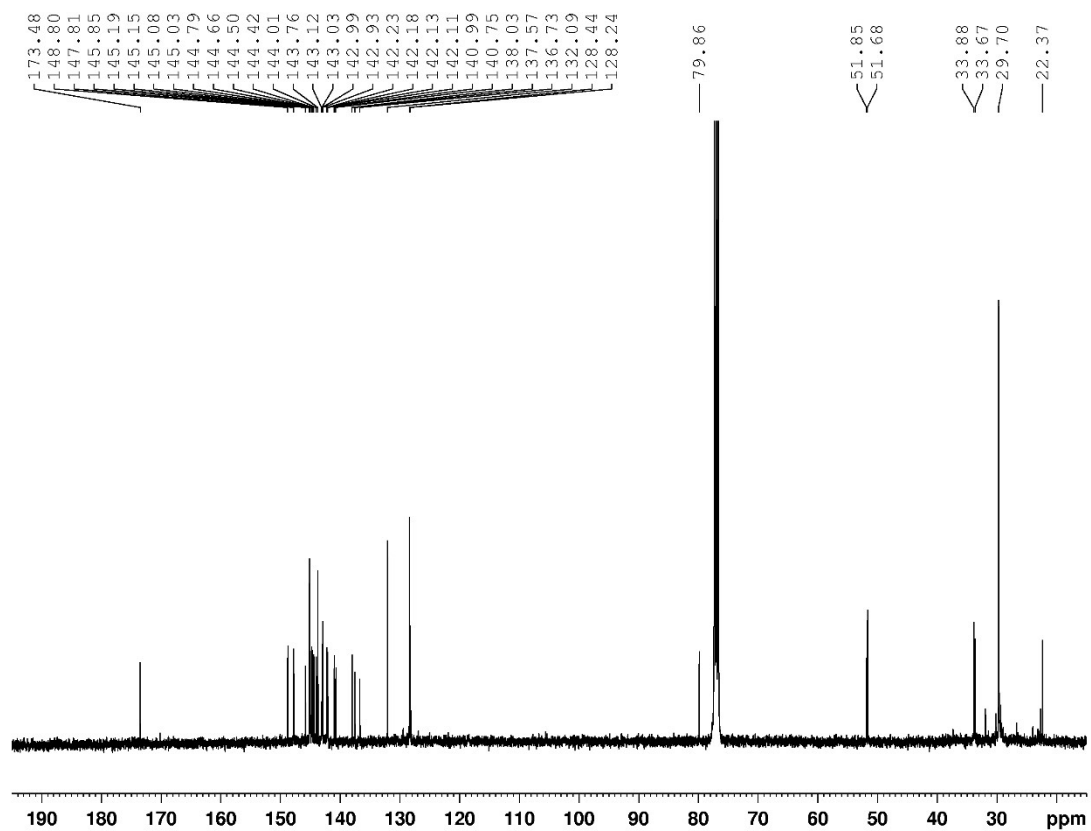

**Figure S2.**  $^{13}\text{C}$ -NMR (100 MHz;  $\text{CDCl}_3$ , 298 K) of  $\text{D-C}_{60}$ .

### Electrochemical Properties.

The electrochemical properties of PC<sub>61</sub>BM and D-C<sub>60</sub> were measured by cyclic voltammetry (CV) on a glassy carbon electrode with *o*-dichlorobenzene (*o*-DCB) as solvent and *n*-Bu<sub>4</sub>NPF<sub>6</sub> as supporting electrolyte. The reduction potentials are shown in **Table 1**. The reduction potentials of PC<sub>61</sub>BM and D-C<sub>60</sub> are similar.

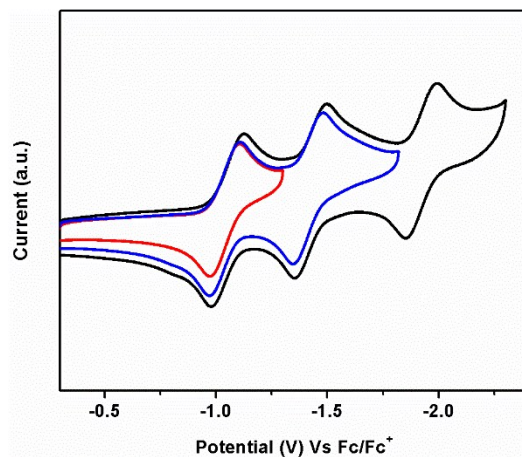

**Figure S3.** Cyclic voltammetric curves of D-C<sub>60</sub> at a scan rate of 100 mV/s.

**Table S1.** Redox Potentials of PC<sub>61</sub>BM and D-C<sub>60</sub>.

| Compound            | E <sup>0/-</sup> | E <sup>-/-2</sup> | E <sup>-2/-3</sup> |
|---------------------|------------------|-------------------|--------------------|
| PC <sub>61</sub> BM | -1.03            | -1.41             | -1.90              |
| D-C <sub>60</sub>   | -1.05            | -1.44             | -1.92              |

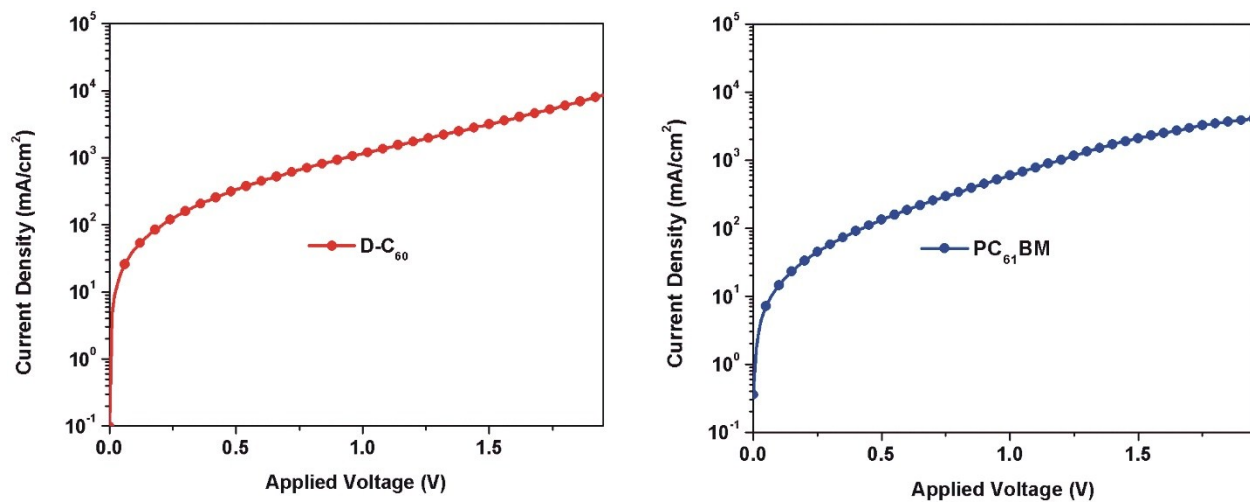

**Figure S4.** Measured space-charge limited  $J$ – $V$  characteristics of the  $\text{PC}_{61}\text{BM}$  and  $\text{D-C}_{60}$  for electron-only devices. The devices with a structure of  $\text{ITO}/\text{Cs}_2\text{CO}_3/\text{D-C}_{60}$  ( $\text{PC}_{61}\text{BM}$ )/ $\text{Ca}/\text{Al}$  were fabricated.

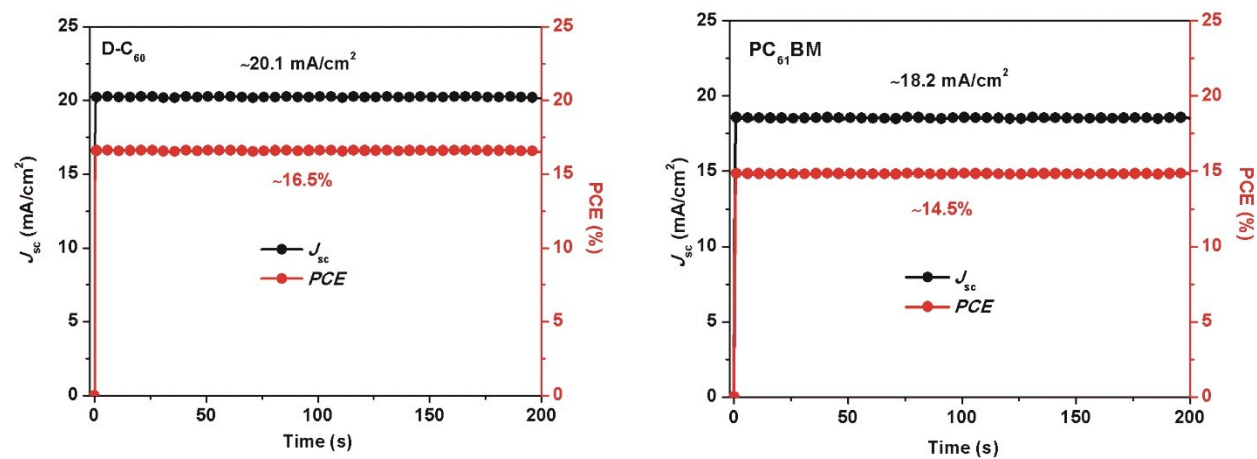

**Figure S5.** Maximal steady-state photocurrent output at the maximum power point (for PC<sub>61</sub>BM based device at 0.80 V, and D-C<sub>60</sub> based device at 0.82 V) and their corresponding power output.

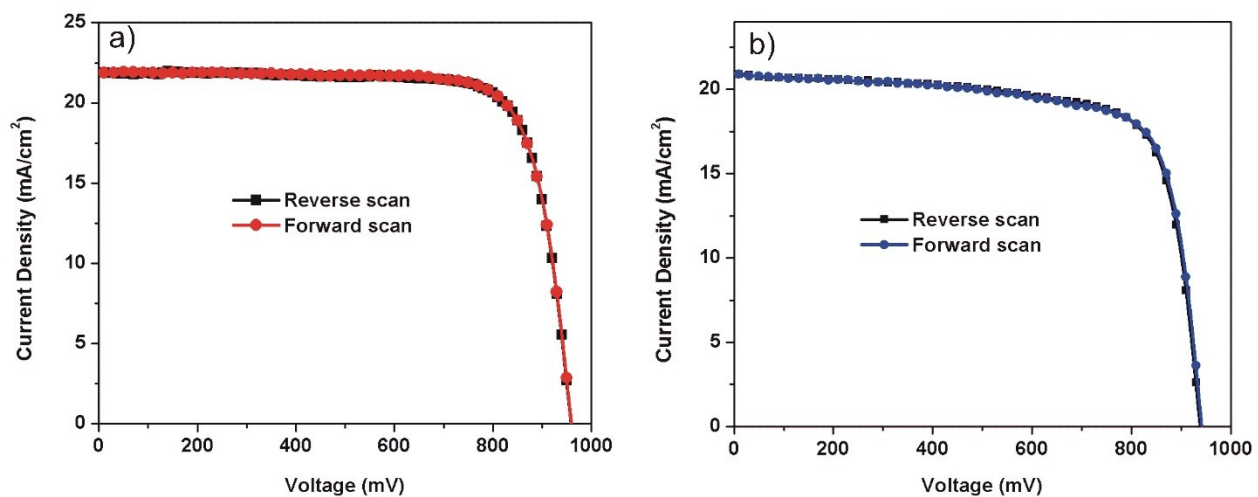

**Figure S6.**  $J$ - $V$  curves of the inverted planar perovskite solar cells based on D- $\text{C}_{60}$  and  $\text{PC}_{61}\text{BM}$  with respect to forward and reverse scan directions (The scanning rate was 100 mV/s).



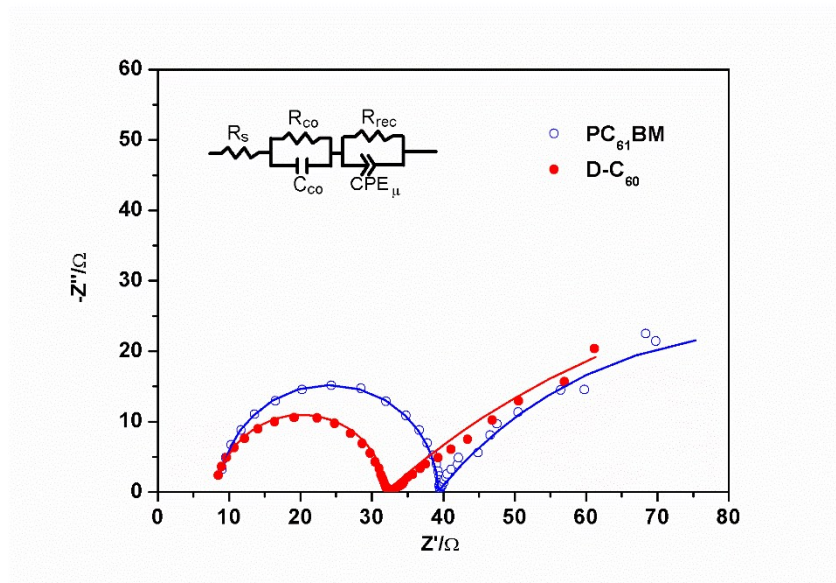

**Figure S7.** Nyquist plots of the perovskite solar cells based on PC<sub>61</sub>BM and D-C<sub>60</sub>.

**Table S2.** Fitting parameters for EIS data under 1 sun illumination.

| Device              | $R_s(\Omega)$ | $R_{co}(\Omega)$ | $C_{co}(F)$ | $R_{rec}(\Omega)$ | $CPE_{\mu-T}(F)$ | $CPE_{\mu-p}(F)$ |
|---------------------|---------------|------------------|-------------|-------------------|------------------|------------------|
| PC <sub>61</sub> BM | 8.80          | 30.43            | 1.959E-8    | 92.85             | 0.02028          | 0.5734           |
| D-C <sub>60</sub>   | 8.26          | 23.68            | 5.353E-8    | 146.7             | 0.02879          | 0.9543           |
